# Supplementary material
Source: HighWire-hosted journal article supplement (https://rapm.bmj.com/content/44/5/549)

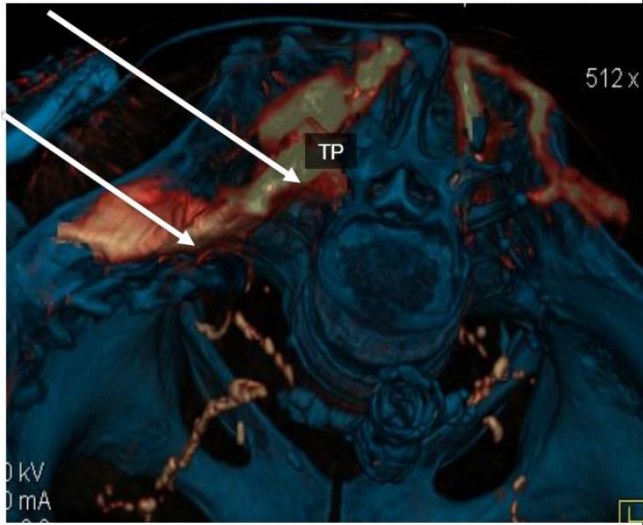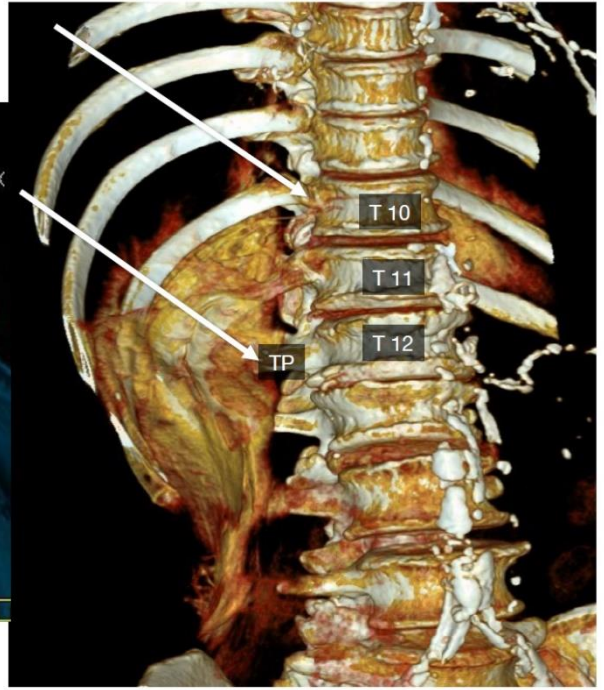

Supplement: inline-supplementary-material-2 [file inline-supplementary-material-2.pdf]

Cranial

T10

TP 10

T11

TP 11

QL

SCN

IH

Caudal

Medial

Lateral

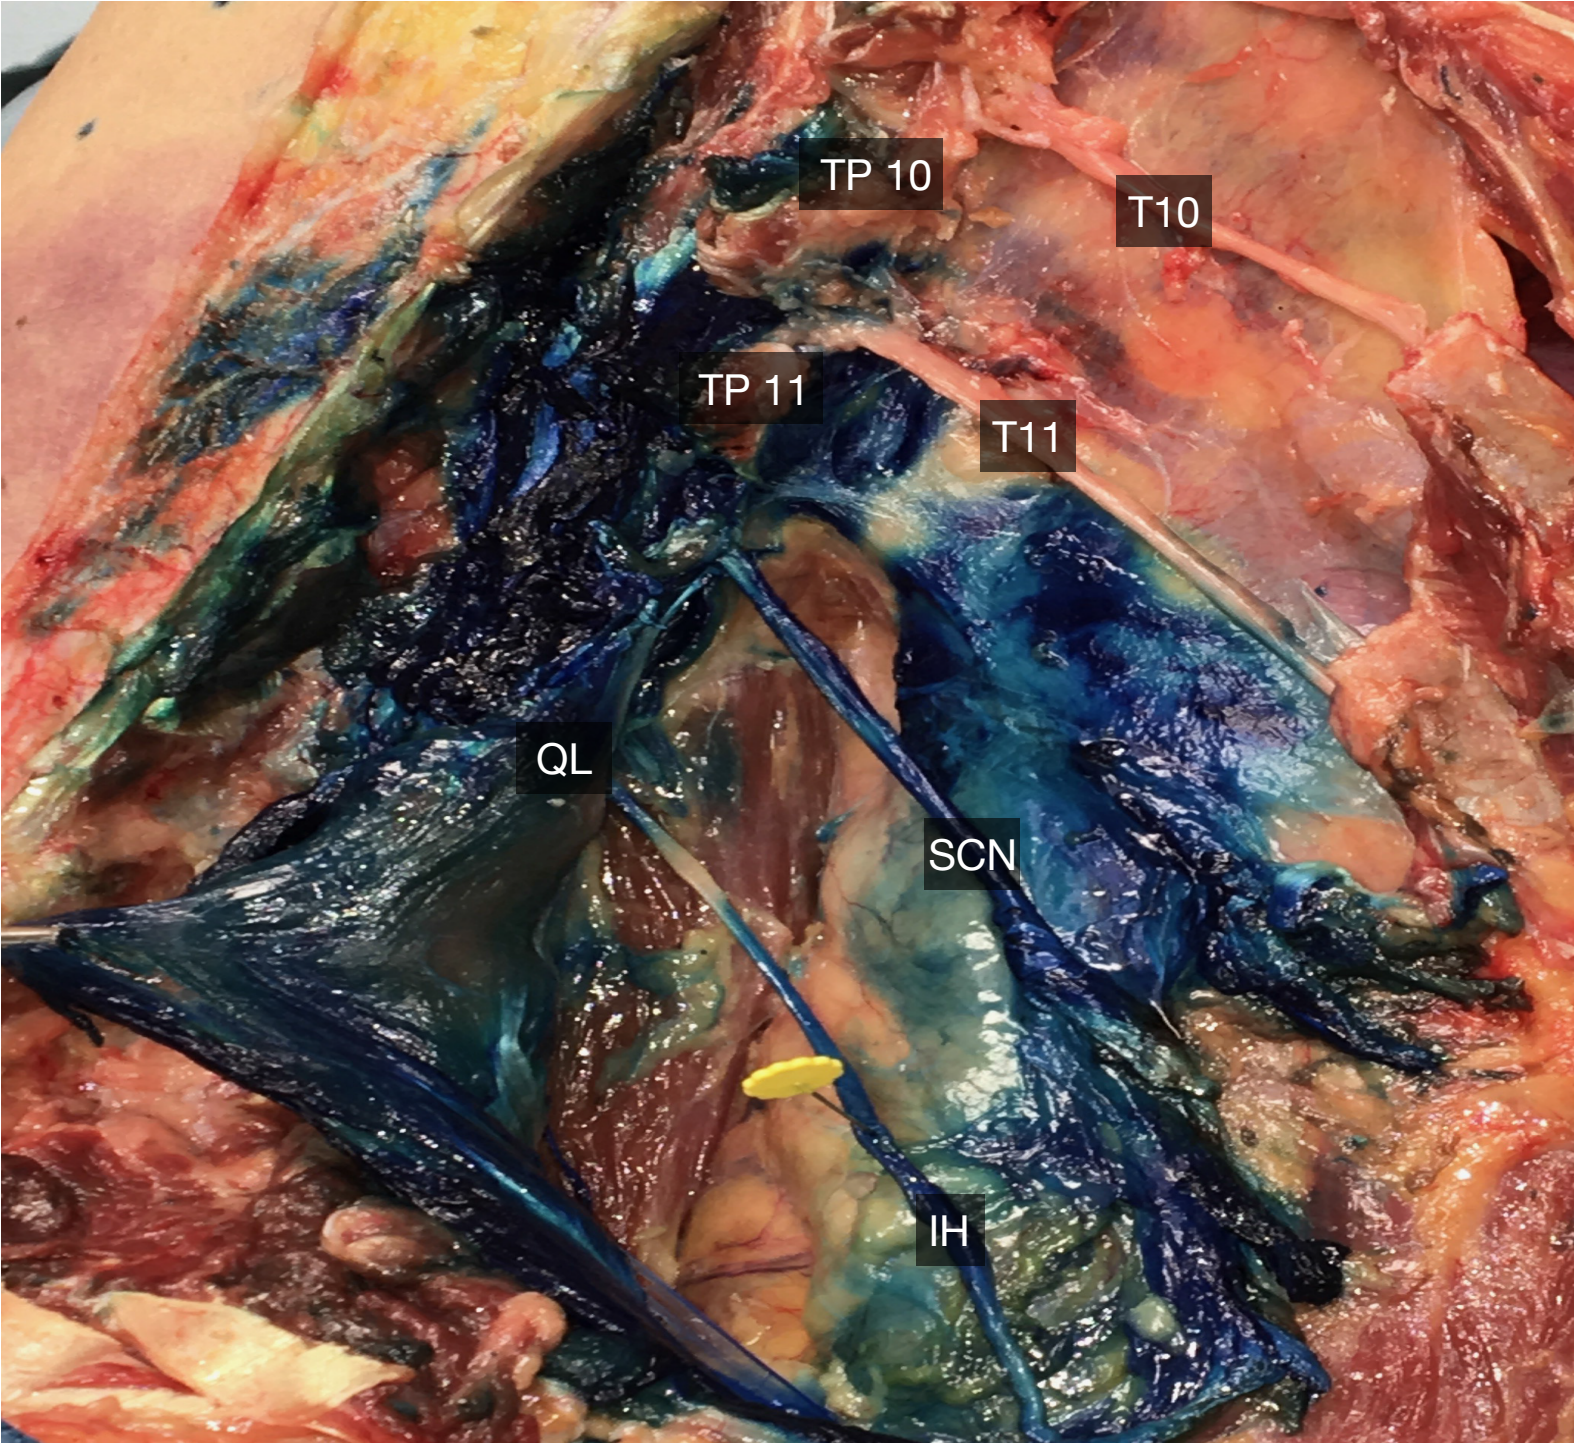

Supplement: inline-supplementary-material-3 [file inline-supplementary-material-3.pdf]
